# Supplementary material for: Antibiotic sensitivity pattern of bacterial pathogens in two tertiary care hospitals in Damascus, Syria: A cross-sectional study
Source: Research Square preprint supplement (doi:10.21203/rs.3.rs-2090332/v1), 2022-09-26
Supplement: Supplementary file 1 [file 365f99fe2d9458c9be84e5f4.docx]

**Additional file 6.** Cross tabulation for isolated bacteria from urine /gender

|  | | | | | |
| --- | --- | --- | --- | --- | --- |
|  | | | Gender | | Total |
| Male | Female |
|  | E-coli | Count | 15 | 29 | 44 | |
| % within bacteria | 34.1% | 65.9% | 100% | |
| % within gender | 25.9% | 28.7% | 27.7% | |
| % of total | 9.4% | 18.2% | 27.7% | |
| S. aureus | Count | 4 | 13 | 17 | |
| % within bacteria | 23.5% | 76.5% | 100% | |
| % within gender | 6.9% | 12.9% | 10.7% | |
| % of total | 2.5% | 8.2% | 10.7% | |
| P. aeruginosa | Count | 5 | 1 | 6 | |
| % within bacteria | 83.3% | 16.7% | 100% | |
| % within gender | 8.6% | 1% | 3.8% | |
| % of total | 3.1% | 0.6% | 3.8% | |
| Enterobacter | Count | 13 | 29 | 42 | |
| % within bacteria | 31% | 69% | 100% | |
| % within gender | 22.4% | 28.7% | 26.4% | |
| % of total | 8.2% | 18.2% | 26.4% | |
| P. mirabilis | Count | 8 | 4 | 12 | |
| % within bacteria | 66.7% | 33.3% | 100% | |
| % within gender | 13.8% | 4% | 7.5% | |
| % of total | 5.0% | 2.5% | 7.5% | |
| K. pneumoniae | Count | 8 | 22 | 30 | |
| % within bacteria | 26.7% | 73.3% | 100% | |
| % within gender | 13.8% | 21.8% | 18.9% | |
| % of total | 5.0% | 13.8% | 18.9% | |
| Serratia marcescens | Count | 1 | 0 | 1 | |
| % within bacteria | 100% | 0% | 100% | |
| % within gender | 1.7% | 0% | 0.6% | |
| % of total | 0.6% | 0% | 0.6% | |
| S. epidermidis | Count | 1 | 0 | 1 | |
| % within bacteria | 100% | 0% | 100% | |
| % within gender | 1.7% | 0% | 0.6% | |
| % of total | 0.6% | 0% | 0.6% | |
| S. saprophyticus | Count | 3 | 3 | 6 | |
| % within bacteria | 50.0% | 50% | 100% | |
| % within gender | 5.2% | 3% | 3.8% | |
| % of total | 1.9% | 1.9% | 3.8% | |
| Total | | Count | 58 | 101 | 159 |
| % within bacteria | 36.5% | 63.5% | 100% |
| % within gender | 100% | 100% | 100% |
| % of total | 36.5% | 63.5% | 100% |
