# Supplementary material for: Antibiotic sensitivity pattern of bacterial pathogens in two tertiary care hospitals in Damascus, Syria: A cross-sectional study
Source: Research Square preprint supplement (doi:10.21203/rs.3.rs-2090332/v1), 2022-09-26
Supplement: Supplementary file 2 [file 47f5690f05bb8188a12c052a.docx]

**Additional file 5**. Frequency of resistant bacteria isolated from burn swab cultures and their resistance rates towards used antibiotics

|  |  |  |  |  |  |  |  |  |  |  |
| --- | --- | --- | --- | --- | --- | --- | --- | --- | --- | --- |
| Antibiotic | Gram-negative | | | | | | | Gram-positive | | Total |
| Ecoli | Entero | K.Pneumo | P.aeruginosa | P.mir | Serratia | Acineto | S. aur | S. epi |
|  |  |  |  |  |  |  |  |  |
| AK | 2 (33.3%) | 23 (82.1%) | 12 (100%) | 2 (33.3%) | 11 (100%) | 2 (66.7%) | 0 (0%) | 5 (55.6%) | 1 (25%) | 58/80 (72.5%) |
| AMC | 6 (100%) | 34 (94.4%) | 13 (100%) | 6 (100%) | 12 (100%) | 4 (80%) | 0 (0%) | 3 (42.9%) | 0 (0%) | 78/90 (86.7%) |
| AZM | - | 2 (66.7%) | 1 (100%) | - | - | - | - | - | 2 (100%) | 5/6 (83.3%) |
| CAZ | - | 2 (100%) | 1 (100%) | 1 (100%) | - | - | - | 0 (0%) | - | 4/5 (80%) |
| CDR | 3 (100%) | 15 (100%) | 7 (100%) | - | 3 (100%) | 1 (50%) | 1 (50%) | 2 (100%) | 0 (0%) | 32/35 (91.4%) |
| Cefo-sulb | - | 0 (0%) | 1 (100%) | 0 (0%) | - | - | - | 0 (0%) | - | 1/5 (20%) |
| CF | 6 (100%) | 24 (96%) | 9 (90%) | 5 (100%) | 11 (100%) | 3 (100%) | 0 (0%) | 3 (60%) | 0 (0%) | 61/69 (88.4%) |
| CFM | 3 (100%) | 9 (100%) | 6 (100%) | 2 (100%) | 5 (100%) | 1 (33.3%) | 0 (0%) | 1 (25%) | 0 (0%) | 27/35 (77.1%) |
| CIP | 5 (100%) | 27 (87.1%) | 12 (92.3%) | 2 (50%) | 11 (100%) | 3 (60%) |  | 4 (66.7%) | 0 (0%) | 65/79 (82.3%) |
| CLR | - | - | 1 (100%) | - | - | - | - | - | - | 1/1 (100%) |
| CPD | 1 (100%) | 4 (100%) | 0 (0%) | 1 (100%) | - | 1 (100%) | 1 (100%) | - | 0 (0%) | 8/10 (80%) |
| CPM | 4 (100%) | 20 (80%) | 12 (100%) | 3 (75%) | 10 (100%) | 1 (50%) | 1 (100%) | 1  (25%) | 0 (0%) | 52/63 (82.5%) |
| CRX | 1 (100%) | 3 (100%) | 1 (100%) | 3 (100%) | - | 1 (50%) | 1 (100%) | - | 3 (100%) | 13/14 (92.9%) |
| CT | 0 (0%) | 14 (37.8%) | 6 (50%) | 0 (0%) | 10 (83.3%) | 2 (50%) | 0 (0%) | 3 (37.5%) | 2 (50%) | 37/91 (40.7%) |
| CTR | 7 (100%) | 36 (97.3%) | 11 (100%) | 4 (100%) | 11 (100%) | 3 (60%) | 0 (0%) | 6 (60%) | 0 (0%) | 78/89 (87.6%) |
| CTX | 7 (100%) | 31 (96.9%) | 11 (91.7%) | 6 (100%) | 8 (100%) | 2 (50%) | 0 (0%) | 5 (50%) | 0 (0%) | 70/83 (84.3%) |
| Dori | - | 0 (0%) | 1 (100%) | - | - | - | - | - | - | 1/2 (50%) |
| GN | 4 (100%) | 18 (94.7%) | 10 (100%) | 2 (66.7%) | 5 (100%) | 1 (50%) | - | 5 (100%) | 3 (100%) | 48/51 (94.1%) |
| IMP | 2 (28.6%) | 22 (64.7%) | 11 (91.7%) | 1 (25%) | 9 (90%) | 3 (75%) | 0 (0%) | 3 (33.3%) | 0 (0%) | 51/83 (61.4%) |
| LEV | 5 (83.3%) | 20 (66.7%) | 8 (80%) | 0 (0%) | 9 (90%) | 1  (50%) | 0 (0%) | 1 (16.7%) | 1 (33.3%) | 45/72 (62.5%) |
| LNZ | - | - | 1 (100%) | - | - | - | - | 1 (12.5%) | 0 (0%) | 2/13 (15.4%) |
| Mero | - | 0 (0%) | 1 (100%) | - | - | - | - | - | - | 1/2 (50%) |
| PF | 1 (100%) | 5 (100%) | - | 1 (100%) | 1 (100%) | 0 (0%) | 0 (0%) | 1 (100%) | 0 (0%) | 9/13 (69.2%) |
| PTZ | 2 (50%) | 20 (64.5%) | 10 (90.9%) | 1 (16.7%) | 9 (90%) | 2 (100%) | 1 (100%) | 3 (37.5%) | 0 (0%) | 48/76 (63.2%) |
| Ts | 2 (100%) | 23 (92%) | 10 (90.9%) | 3 (100%) | 7 (100%) | 2 (100%) | 1 (100%) | 8 (100%) | 1 (33.3%) | 57/62 (91.9%) |
| VA | - | - | - | - | - | - | - | 1 (11.1%) | 1 (33.3%) | 2/12 (16.7%) |
|  |  |  |  |  |  |  |  |  |  |  |

**Abbreviations
Acineto**: Acinetobacter **AK**: amikacin, **AMC**: amoxicillin and clavulanic acid, **AZM**: azithromycin, **CAZ**: ceftazidime, **CDR**: cefdinir, **Cefo-sulb**: cefoperazone-sulbactam, **CF**: cefaclor, **CFM**: cefixime, **CIP**: ciprofloxacin, **CLR**: clarithromycin, **CPD**: cefpodoxime, **CPM**: cefepime, **CRX**: cefuroxime, **CT**: colistin, **CTR**: ceftriaxone, **CTX**: cefotaxime, **Dori**: doripenem, **Ecoli**: Escherichia coli, **Entero**: Enterobacter, **GN**: gentamycin, **IMP**: imipenem, **K.Pneumo**: : Klebsiella pneumoniae, **LEV**: levofloxacin, **LNZ**: linezolid, **Mero**: meropenem, **NA**: nalidixic acid, **NIT**: nitrofurantoin, **P.aeruginosa**: Pseudomonas aeruginosa, **PF**: pefloxacin, **P.mir**: Proteus mirabilis, **PTZ**: piperacillin/tazobactam, **Serratia**: Serratia marcescens, **S.aur**: Staphylococcus aureus, **S.epi**: Staphylococcus epidermis, **S.pyo**: Staphylococcus pyogenes, **S.sap**: Staphylococcus saprophyticus, **S. pneumo**: Streptococcus pneumoniae, **Ts**: trimethoprim/sulfamethoxazole, **VA**: vancomycin.
