# Supplementary material for: Antibiotic sensitivity pattern of bacterial pathogens in two tertiary care hospitals in Damascus, Syria: A cross-sectional study
Source: Research Square preprint supplement (doi:10.21203/rs.3.rs-2090332/v1), 2022-09-26
Supplement: Supplementary file 3 [file c1ac33d5797596f841a74ca8.docx]

**Additional file 2**. Frequency of resistant bacteria isolated from urine cultures and their resistance rates towards used antibiotics

|  |  |  |  |  |  |  |  |  |  |  |
| --- | --- | --- | --- | --- | --- | --- | --- | --- | --- | --- |
| Antibiotic | Gram-negative bacteria | | | | | | Gram-positive bacteria | | |  |
| Ecoli | Entero | K.Pneumo | P.aeruginosa | P.mir | Serratia | S. aur | S. epi | S. Sap | Total |
|  |  |  |  |  |  |  |  |  |
| AK | 4 (11.1%) | 3 (12.5%) | 2 (8.7%) | 0 (0%) | 0 (0%) | 0 (0%) | 2 (22.2%) | - | 0 (0%) | 11/110 (10%) |
| AMC | 13 (39.4%) | 22 (32.4%) | 12 (66.7%) | 3 (100%) | 9 (81.8%) | 1 (100%) | 4 (28.6%) | 1 (100%) | 3 (50%) | 68/121 (56.2%) |
| AZM | 1 (100%) | - | 1 (100%) | - | - | - | 2 (100%) | - | - | 4/4 (100%) |
| CAZ | 9 (31%) | 7 (43.8%) | 18 (78.3%) | 5 (100%) | 3 (60%) | - | - | - | 4 (66.7%) | 46/84 (54.8%) |
| CDR | 6 (85.7%) | 6 (60%) | 1 (100%) | - | 3 (75%) | - | 2 (50%) | 1 (100%) | - | 19/27 (70.4%) |
| Cefo-sulb | 0 (0%) | 0 (0%) | 3 (12.5%) | 0 (0%) | 0 (0%) | - | - | - | 0 (0%) | 3/85 (3.5%) |
| CF | 11 (91.7%) | 13 (76.5%) | 5 (100%) | 1 (100%) | 5 (100%) | 1 (100%) | 2 (25%) | - | - | 38/49 (77.6%) |
| CFM | 12 (52.2%) | 9 (52.9%) | 8 (66.7%) | 3 (100%) | 5 (83.3%) | 1 (100%) | 2 (50%) | - | 3 (100%) | 43/69 (62.3%) |
| CIP | 7 (58.3%) | 11 (61.1%) | 2 (40%) | 2 (100%) | 6 (85.7%) | 1 (100%) | 7 (50%) | 1 (100%) | - | 37/60 (61.7%) |
| CLR | 1 (100%) | - | - | - | 1 (100%) | - | 1 (100%) | 1 (100%) | - | 4/4 (100%) |
| CPD | - | 1 (33.3%) | - | - | 1 (100%) | 1 (100%) | 0 (0%) | 1 (100%) | - | 4/7 (57.1%) |
| CPM | 13 (40.6%) | 14 (43.8%) | 11 (42.3%) | 5 (100%) | 4 (50%) | - | 1 (20%) | 1 (100%) | 3 (75%) | 52/113 (46%) |
| CRX | 3 (100%) | 2 (40%) | 0 (0%) | - | 1 (50%) | 1 (100%) | 4 (57.1%) | - | - | 11/19 (57.9%) |
| CT | 1  (4.3%) | 3 (12.5%) | 0 (0%) | 0 (0%) | 4 (57.1%) | - | 1 (33.3%) | 0 (0%) | 0 (0%) | 9/87 (10.3%) |
| CTR | 16 (40%) | 20 (57.1%) | 19 (67.9%) | 6 (100%) | 8 (72.7%) | 1 (100%) | 5 (35.7%) | - | 3 (50%) | 78/141 (53.3%) |
| CTX | 17 (43.6%) | 21 (56.8%) | 15 (57.7%) | 5 (100%) | 8 (72.7%) | 1 (100%) | 6 (37.5%) | - | 3 (50%) | 76/141 (53.9%) |
| Dori | 0 (0%) | 0 (0%) | 0 (0%) | 0 (0%) | - | - | - | - | 0 (0%) | 0/17 (0%) |
| GN | 7 (63.6%) | 7 (41.2%) | 1 (14.3%) | 1 (50%) | 3 (42.9%) | 1 (100%) | 3 (27.3%) | - | - | 23/56 (41.1%) |
| IMP | 2 (7.7%) | 3 (18.8%) | 2 (12.5%) | 0 (0%) | 0 (0%) | - | 0 (0%) | - | 0 (0%) | 7/72 (9.7%) |
| LEV | 5 (13.5%) | 3 (10.7%) | 1 (3.8%) | 4  (80%) | 1 (14.3%) | - | 0 (0%) | 1 (100%) | 0 (100%) | 15/119 (12.6%) |
| LNZ | 1 (100%) | - | - | - | - | - | 5 (45.5%) | - | - | 6/12 (50%) |
| Mero | 0 (0%) | 0 (0%) | 0 (0%) | 1 (100%) | 0 (0%) | - | - | - | 1 (50%) | 2/22 (9.1%) |
| NA | 10 (100%) | 15 (75%) | 4 (80%) | 1 (100%) | 5 (71.4%) | 1 (100%) | 11 (68.8%) | 0 (0%) | - | 47/61 (77%) |
| NIT | 7 (16.3%) | 12 (30%) | 7 (25.9%) | 5 (100%) | 5 (50%) | 0 (0%) | 5 (29.4%) | 1 (100%) | 1 (16.7%) | 43/150 (28.7%) |
| PF | 1 (50%) | 1 (50%) | 0 (0%) | - | 1 (100%) | 1 (100%) | 2 (100%) | - | - | 6/9 66.7%) |
| PTZ | 4 (10.5%) | 3 (10.3%) | 8 (34.8%) | 2 (50%) | 3 (37.5%) | - | 2 (25%) | - | 1 (25%) | 23/114 (20.2%) |
| Ts | 23 (67.6%) | 22 (64.7%) | 12 (60%) | 5 (100%) | 7 (100%) | - | 8 (53.3%) | - | 3 (60%) | 80/120 (66.7%) |
| VA | 1 (100%) | - | - | - | - | - | 6 (46.2%) | - | - | 7/14 (50%) |
|  |  |  |  |  |  |  |  |  |  |  |

**Abbreviations
Acineto**: Acinetobacter **AK**: amikacin, **AMC**: amoxicillin and clavulanic acid, **AZM**: azithromycin, **CAZ**: ceftazidime, **CDR**: cefdinir, **Cefo-sulb**: cefoperazone-sulbactam, **CF**: cefaclor, **CFM**: cefixime, **CIP**: ciprofloxacin, **CLR**: clarithromycin, **CPD**: cefpodoxime, **CPM**: cefepime, **CRX**: cefuroxime, **CT**: colistin, **CTR**: ceftriaxone, **CTX**: cefotaxime, **Dori**: doripenem, **Ecoli**: Escherichia coli, **Entero**: Enterobacter, **GN**: gentamycin, **IMP**: imipenem, **K.Pneumo**: : Klebsiella pneumoniae, **LEV**: levofloxacin, **LNZ**: linezolid, **Mero**: meropenem, **NA**: nalidixic acid, **NIT**: nitrofurantoin, **P.aeruginosa**: Pseudomonas aeruginosa, **PF**: pefloxacin, **P.mir**: Proteus mirabilis, **PTZ**: piperacillin/tazobactam, **Serratia**: Serratia marcescens, **S.aur**: Staphylococcus aureus, **S.epi**: Staphylococcus epidermis, **S.pyo**: Staphylococcus pyogenes, **S.sap**: Staphylococcus saprophyticus, **S. pneumo**: Streptococcus pneumoniae, **Ts**: trimethoprim/sulfamethoxazole, **VA**: vancomycin.
