# Supplementary material for: Antibiotic sensitivity pattern of bacterial pathogens in two tertiary care hospitals in Damascus, Syria: A cross-sectional study
Source: Research Square preprint supplement (doi:10.21203/rs.3.rs-2090332/v1), 2022-09-26
Supplement: Supplementary file 4 [file c4ec143daeb864d98a766fd1.docx]

**Additional file 1**. Frequency of resistant bacteria isolated from all cultures and their resistance rates towards used antibiotics

|  |  |  |  |  |  |  |  |  |  |  |  |  |  |
| --- | --- | --- | --- | --- | --- | --- | --- | --- | --- | --- | --- | --- | --- |
| Antibiotic | Gram-negative | | | | | | | Gram-positive | | | | | Total |
| Ecoli | Entero | K.Pneumo | P.aeruginosa | P.mir | M.Serratia | Acineto | S. aur | S. epi | S. pyo | S. pneumo | S. Sap |
|  |  |  |  |  |  |  |  |  |  |  |  |
| AK | 14 (25%) | 41 (55.4%) | 24 (45.3%) | 10 (50%) | 11 (57.9%) | 2 (40%) | 2 (66.7%) | 15 (33.3%) | 5 (31.3%) | 0 (0%) | - | 0 (0%) | 124 (41.5%) |
| AMC | 33 (60%) | 88 (86.3%) | 38 (79.2%) | 18 (100%) | 22 (91.7%) | 8 (88.9%) | 1 (50%) | 15 (27.8%) | 4 (21.1%) | 1 (33.3%) | 0 (0%) | 3 (50%) | 231 (67.5%) |
| AZM | 4 (100%) | 21 (91.3%) | 7 (87.5%) | 5  (100%) | - | 2 (100%) | 1 (100%) | 9 (64.3%) | 5 (71.4%) | - | 0 (0%) | - | 54 (83.1%) |
| CAZ | 10 (32.3%) | 13 (56.5%) | 25 (83.3%) | 8 (100%) | 3 (60%) | - | 1 (50%) | 2 (33.3%) | 0 (0%) | 1 (50%) | - | 4 (66.7%) | 67 (58/3%) |
| CDR | 12 (92.3%) | 31 (88.6%) | 13 (100%) | 2 (100%) | 6 (85.7%) | 1 (50%) | 3 (75%) | 6 (54.5%) | 4 (50%) | - | 0 (0%) | - | 78 (81.3%) |
| Cefo-sulb | 0 (0%) | 0 (0%) | 5 (16.1%) | 0/8 (0%) | 1 (16.7%) | - | - | 1 (16.7%) | 0 (0%) | 0 (0%) | - | 0 (0%) | 7  (6%) |
| CF | 22 (95.7%) | 52 (89.7%) | 22 (95.7%) | 13 (100%) | 16 (100%) | 22 (95.7%) | 1 (50%) | 11 (36.7%) | 1 (14.3%) | - | 0 (0%) | - | 144 (80%) |
| CFM | 21 (58.3%) | 27 (73%) | 21 (75%) | 12 (100%) | 11 (91.7%) | 6 (100%) | 1 (50%) | 10 (47.6%) | 2 (33.3%) | 1 (33.3%) | 1 (100%) | 3 (100%) | 113 (68.1%) |
| CIP | 21 (72.4%) | 54 (80.6%) | 19 (70.4%) | 10 (83.3%) | 17 (94.4%) | 7 (77.8%) | 2 (100%) | 16 (51.6%) | 3 (42.9%) | 0 (0%) | 0 (0%) | - | 149 (72.7%) |
| CLR | 3 (100%) | 8 (100%) | 4 (100%) | 4 (100%) | 1 (100%) | 1 (100%) | 1 (100%) | 3 (50%) | 1 (33.3%) | - | - | - | 26 (83.9%) |
| CPD | 2 (100%) | 5 (71.4%) | 3 (75%) | 1 (100%) | 1 (100%) | 2 (100%) | 2 (100%) | 1 (33.3%) | 5 (83.3%) | - | - | - | 22 (78.6%) |
| CPM | 20 (43.5%) | 56 (66.7%) | 32 (61.5%) | 18 (90%) | 15 (78.9%) | 3 (75%) | 2 (66.7%) | 16 (42.1%) | 3 (33.3%) | 1 (50%) | 0 (0%) | 3 (75%) | 169 (59.9%) |
| CRX | 8 (100%) | 9 (75%) | 7 (87.5%) | 6 (100%) | 1 (50%) | 3 (75%) | 2 (100%) | 5 (41.7%) | 5 (62.5%) | - | 1 (100%) | - | 47 (74.6%) |
| CT | 2 (4.4%) | 22 (23.4%) | 6 (10.5%) | 1 (4.8%) | 14 (73.7%) | 2 (28.6%) | 0 (0%) | 19 (42.2%) | 9 (47.4%) | - | 0 (0%) | 0 (0%) | 75 (24%) |
| CTR | 33 (53.2%) | 82 (80.4%) | 45 (80.4%) | 19 (95%) | 20 (87%) | 7 (77.8%) | 0 (0%) | 29 (50%) | 4 (33.3%) | 1 (33.3%) | 0 (0%) | 3 (50%) | 243 (68.6%) |
| CTX | 37 (59.7%) | 81 (80.2%) | 39 (72.2%) | 20 (100%) | 17 (85%) | 6 (75%) | 1 (50%) | 26 (41.9%) | 1 (8.3%) | 1 (33.3%) | 0 (0%) | 3 (50%) | 232 (65.9%) |
| Dori | 0 (0%) | 0 (0%) | 2 (25%) | 0 (0%) | - | - | - | 0 (0%) | 0 (0%) | - | - | 0 (0%) | 2/29 (6.9%) |
| GN | 19 (67.9%) | 41 (74.5%) | 18 (66.7%) | 6 (66.7%) | 8 (66.7%) | 4 (80%) | - | 21 (53.8%) | 3 (50%) | 0 (0%) | 0 (0%) | - | 120 (65.2%) |
| IMP | 9 (20%) | 46 (59%) | 18 (40%) | 6 (35.3%) | 9 (56.3%) | 5 (83.3%) | 1 (33.3%) | 13 (31.7%) | 3 (23.1%) | 0 (0%) | 0 (0%) | 0 (0%) | 110 (40.9%) |
| LEV | 16 (28.6%) | 36 (43.9%) | 15 (29.4%) | 7 (46.7%) | 10 (55.6%) | 4 (80%) | 1 (33.3%) | 7 (19.4%) | 3 (25%) | 0 (0%) | 0 (0%) | 0 (0%) | 99 (34.4%) |
| LNZ | 1 (100%) | 3 (100%) | 1 (100%) | 1  (100%) | - | - | - | 12 (24.5%) | 3 (18.8%) | 0 (0%) | 0 (0%) | - | 21/74 (28.4%) |
| Mero | 0 (0%) | 1 (25%) | 3 (23.1%) | 2 (100%) | 0 (0%) | - | - | 2 (50%) | 0 (0%) | - | - | 1 (50%) | 9 (25%) |
| NA | 11 (100%) | 15 (75%) | 4 (80%) | 1 (100%) | 5 (71.4%) | 1 (100%) | - | 11 (61.1%) | 0 (0%) | - | - | - | 48 (75%) |
| NIT | 7 (16.3%) | 12 (30%) | 7 (25.9%) | 5 (100%) | 5 (50%) | 0 (0%) | - | 5 (29.4%) | 1 (100%) | - | - | 1 (16.7%) | 43 (28.7%) |
| PF | 4 (80%) | 8 (88.9%) | 5 (71.4%) | 1 (100%) | 2 (100%) | 1 (50%) | 0 (0%) | 4 (80%) | 1 (20%) | - | - | - | 26 (68.4%) |
| PTZ | 13 (23.6%) | 41 (47.1%) | 29 (58%) | 6 (31.6%) | 13 (68.4%) | 4 (100%) | 1 (50%) | 10 (23.3%) | 1 (6.3%) | 1 (50%) | 0 (0%) | 1 (25%) | 120 (39.6%) |
| Ts | 35 (72.9%) | 69 (80.2%) | 31 (68.9%) | 11 (84.6%) | 15 (100%) | 4 (100%) | 1 (100%) | 30 (62.5%) | 3 (33.3%) | 1 (33.3%) | 0 (0%) | 3 (60%) | 203 (72.8%) |
| VA | 1 (100%) | 1 (100%) | 1 (100%) | 0 (0%) | - | - | - | 12 (23.5%) | 4 (25%) | 0 (0%) | 0 (0%) | - | 19 (26%) |
|  |  |  |  |  |  |  |  |  |  |  |  |  |  |

**Abbreviations
Acineto**: Acinetobacter **AK**: amikacin, **AMC**: amoxicillin and clavulanic acid, **AZM**: azithromycin, **CAZ**: ceftazidime, **CDR**: cefdinir, **Cefo-sulb**: cefoperazone-sulbactam, **CF**: cefaclor, **CFM**: cefixime, **CIP**: ciprofloxacin, **CLR**: clarithromycin, **CPD**: cefpodoxime, **CPM**: cefepime, **CRX**: cefuroxime, **CT**: colistin, **CTR**: ceftriaxone, **CTX**: cefotaxime, **Dori**: doripenem, **Ecoli**: Escherichia coli, **Entero**: Enterobacter, **GN**: gentamycin, **IMP**: imipenem, **K.Pneumo**: : Klebsiella pneumoniae, **LEV**: levofloxacin, **LNZ**: linezolid, **Mero**: meropenem, **NA**: nalidixic acid, **NIT**: nitrofurantoin, **P.aeruginosa**: Pseudomonas aeruginosa, **PF**: pefloxacin, **P.mir**: Proteus mirabilis, **PTZ**: piperacillin/tazobactam, **Serratia**: Serratia marcescens, **S.aur**: Staphylococcus aureus, **S.epi**: Staphylococcus epidermis, **S.pyo**: Staphylococcus pyogenes, **S.sap**: Staphylococcus saprophyticus, **S. pneumo**: Streptococcus pneumoniae, **Ts**: trimethoprim/sulfamethoxazole, **VA**: vancomycin.
