# Supplementary material for: Antibiotic sensitivity pattern of bacterial pathogens in two tertiary care hospitals in Damascus, Syria: A cross-sectional study
Source: Research Square preprint supplement (doi:10.21203/rs.3.rs-2090332/v1), 2022-09-26
Supplement: Supplementary file 5 [file d2c72955d1b1f27f1634f956.docx]

**Additional file 3**. Frequency of resistant bacteria isolated from blood cultures and their resistance rates towards used antibiotics

|  |  |  |  |  |  |  |  |
| --- | --- | --- | --- | --- | --- | --- | --- |
| Antibiotic | Gram-negative | | | Gram-positive | | | Total |
| Entero | K. Pneumo | M.Serratia | S. aur | S. epi | S. pneumo |
|  |  |  |  |  |  |  |
| AK | 3 (100%) | 1 (50%) | - | 2 (28.6%) | 4 (66.7%) | - | 10/18 (55.6%) |
| AMC | 3  (100%) | 0 (0%) | 1 (100%) | 2 (20%) | 2 (25%) | 0 (0%) | 8/25 (32%) |
| AZM | 4 (100%) | - | 1 (100%) | 3 (75%) | 2 (100%) | - | 10/11 (90.9%) |
| CDR | 1 (100%) | - | - | 0 (0%) | 3 (60%) | - | 4/7 (57.1%) |
| CF | 1 (100%) | 2 (100%) | 1 (100%) | 3 (50%) | 0 (0%) | 0 (0%) | 7/14 (50%) |
| CFM | 1 (50%) | 1 (50%) | - | 1 (33.3%) | 2 (100%) | 1 (100%) | 6/10 (60%) |
| CIP | - | 0 (0%) | 1 (100%) | 0 (0%) | - | 0 (0%) | 1/5 (20%) |
| CPD | - | - | - | 0 (0%) | 3 (100%) | - | 3/4 (75%) |
| CPM | 3 (100%) | 1 (50%) | - | 4 (44.4%) | 2 (66.7%) | 0 (0%) | 10/18 (55.6%) |
| CRX | 2 (100%) | 1 (100%) | - | 0 (0%) | 1 (50%) | 1 (100%) | 5/9 (55.6%) |
| CT | 2 (50%) | 0 (0%) | 0 (0%) | 5 (45.5%) | 5 (55.6%) | 0 (0%) | 12/28 (42.9%) |
| CTR | 2 (100%) | 1 (50%) | 1 (100%) | 4 (66.7%) | 4 (66.7%) | 0 (0%) | 12/18 (66.7%) |
| CTX | 3 (100%) | 1 (100%) | 1 (100%) | 3 (30%) | 1 (33.3%) | 0 (0%) | 9/19 (47.4%) |
| GN | 2 (100%) | 1 (100%) | 1 (100%) | 5 (71.4%) | 0 (0%) | - | 9/13 (69.2%) |
| IMP | 2 (66.7%) | 1 (50%) | 1 (100%) | 3 (42.9%) | 3 (37.5%) | 0 (0%) | 10/22 (45.5%) |
| LEV | - | - | 1 (100%) | 1 (16.7%) | 0 (0%) | 0 (0%) | 2/10 (20%) |
| LNZ | 1 (100%) | - | - | 1 (14.3%) | 3 (37.5%) | 0 (0%) | 5/17 (29.4%) |
| PF | - | - | - | - | 1 (50%) | - | 1/2 (50%) |
| PTZ | 2 (66.7%) | 0 (0%) | 1 (100%) | 0 (0%) | 1 (12.5%) | 0 (0%) | 4/21 (19%) |
| Ts | 3 (100%) | 0 (0%) | 1 (100%) | 4 (80%) | 1 (33.3%) | 0 (0%) | 9/14 (64.3%) |
| VA | - | - | - | 1 (12.5%) | 2 (25%) | 0 (0%) | 3/17 (17.6%) |
|  |  |  |  |  |  |  |  |

**Abbreviations
Acineto**: Acinetobacter **AK**: amikacin, **AMC**: amoxicillin and clavulanic acid, **AZM**: azithromycin, **CAZ**: ceftazidime, **CDR**: cefdinir, **Cefo-sulb**: cefoperazone-sulbactam, **CF**: cefaclor, **CFM**: cefixime, **CIP**: ciprofloxacin, **CLR**: clarithromycin, **CPD**: cefpodoxime, **CPM**: cefepime, **CRX**: cefuroxime, **CT**: colistin, **CTR**: ceftriaxone, **CTX**: cefotaxime, **Dori**: doripenem, **Ecoli**: Escherichia coli, **Entero**: Enterobacter, **GN**: gentamycin, **IMP**: imipenem, **K.Pneumo**: : Klebsiella pneumoniae, **LEV**: levofloxacin, **LNZ**: linezolid, **Mero**: meropenem, **NA**: nalidixic acid, **NIT**: nitrofurantoin, **P.aeruginosa**: Pseudomonas aeruginosa, **PF**: pefloxacin, **P.mir**: Proteus mirabilis, **PTZ**: piperacillin/tazobactam, **Serratia**: Serratia marcescens, **S.aur**: Staphylococcus aureus, **S.epi**: Staphylococcus epidermis, **S.pyo**: Staphylococcus pyogenes, **S.sap**: Staphylococcus saprophyticus, **S. pneumo**: Streptococcus pneumoniae, **Ts**: trimethoprim/sulfamethoxazole, **VA**: vancomycin.
