# Supplementary material for: Antibiotic sensitivity pattern of bacterial pathogens in two tertiary care hospitals in Damascus, Syria: A cross-sectional study
Source: Research Square preprint supplement (doi:10.21203/rs.3.rs-2090332/v1), 2022-09-26
Supplement: Supplementary file 6 [file dd6ef33be6ee9899ae9ead8f.docx]

**Additional file 4**. Frequency of resistant bacteria isolated from sputum cultures and their resistance rates towards used antibiotics

|  |  |  |  |  |  |  |  |  |  |
| --- | --- | --- | --- | --- | --- | --- | --- | --- | --- |
| Antibiotic | Gram-negative bacteria | | | | | Gram-positive bacteria | | | Total |
| Ecoli | Entero | K.Pneumo | P.aeruginosa | acineto | S. aur | S. epi | S. pneumo |
|  |  |  |  |  |  |  |  |
| AK | 4 (80%) | 9 (81.8%) | 5 (55.6%) | 6 (75%) | - | 2 (40%) | 0 (0%) | 1 (100%) | 27/30 (67.5%) |
| AMC | 7 (100%) | 18 (100%) | 8 (88.9%) | 7 (100%) | - | 5 (62.5%) | 0 (0%) | 0 (0%) | 45/51 (88.2%) |
| AZM | 2 (100%) | 14 (100%) | 5 (83.3%) | 5 (100%) | 1 (100%) | 2 (50%) | 1 (100%) | 0 (0%) | 30/34 (88.2%) |
| CAZ | 1 (100%) | 2 (100%) | 4 (100%) | 2 (100%) | - | 2 (100%) | - | - | 11/11 (100%) |
| CDR | 2 (100%) | 9 (100%) | 2 (100%) | 1 (100%) | 1 (100%) | 1 (50%) | - | 0 (0%) | 16/18 (88.9%) |
| Cefo-sulb | 0 (0%) | 0 (0%) | 1 (25%) | 0 (0%) | - | 1 (50%) | - | - | 2/11 (18.2%) |
| CF | 2 (100%) | 10 (90.9%) | 3 (100%) | 5 (100%) | - | 2 (66.7%) | - | 0 (0%) | 22/25 (88%) |
| CFM | 2 (66.7%) | 5 (83.3%) | 4 (80%) | 5 (100%) | - | 1 (50%) | - | - | 17/21 (81%) |
| CIP | 5 (83.3%) | 11 (84.6%) | 3 (75%) | 4 (100%) | - | 1 (50%) | 1 (100%) | 0 (0%) | 25/31 (80.6%) |
| CLR | 2 (100%) | 7 (100%) | 3 (100%) | 4 (100%) | 1 (100%) | 1 (25%) | 0 (0%) | - | 18/22 (81.8%) |
| CPD | - | - | 1 (100%) | - | 1 (100%) | - | - | - | 2/2 (100%) |
| CPM | 2 (50%) | 13 (92.9%) | 6 (100%) | 8 (100%) | 0 (0%) | 5 (83.3%) | - | - | 34/39 (87.2%) |
| CRX | 2 (100%) | 1 (100%) | 2 (100%) | 1 (100%) | 1 (100%) | - | - | - | 7/7 (100%) |
| CT | 0 (0%) | 1 (5.3%) | 0 (0%) | 0 (0%) | 0 (0%) | 3 (50%) | 0 (0%) | 0 (0%) | 4/52 (7.7%) |
| CTR | 5 (83.3%) | 18 (94.7%) | 9 (100%) | 7 (100%) | - | 6 (75%) | 0 (0%) | 0 (0%) | 45/51 (88.2%) |
| CTX | 5 (83.3%) | 18 (100%) | 9 (90%) | 6 (100%) | - | 7 (87.5%) | 0 (0%) | 0 (0%) | 45/50 (90%) |
| Dori | - | 0 (0%) | 0 (0%) | 0 (0%) | - | 0 (0%) | - | - | 0/5 (0%) |
| GN | 3 (75%) | 9 (81.8%) | 5 (83.3%) | 3 (100%) | - | 3 (60%) | - | 0 (10) | 23/30 (76.7%) |
| IMP | 2 (40%) | 14 (87.5%) | 3 (66.7%) | 4 (57.1%) | 0 (0%) | 4 (80%) | 0 (0%) | 0 (0%) | 27/45 (60%) |
| LEV | 3 (50%) | 9 (64.3%) | 3 (42.9%) | 2 (50%) | 0 (0%) | 2 (40%) | 0 (0%) | 0 (0%) | 19/39 (48.7%) |
| LNZ | - | 2 (100%) | - | - | - | 4 (66.7%) | 0 (0%) | - | 6/9 (66.7%) |
| Mero | - | 1 (100%) | 1 (50%) | 1 (100%) | - | 2 (100%) | - | - | 5/6 (83.3%) |
| PF | - | 2 (100%) | 4 (100%) | - | 0 (0%) | - | - | - | 6/7 (85.7%) |
| PTZ | 4 (66.7%) | 12 (80%) | 7 (70%) | 2 (28.6%) | 0 (0%) | 4 (66.7%) | 0 (0%) | 0 (0%) | 29/47 (61.7%) |
| Ts | 4 (66.7%) | 12 (85.7%) | 6 (75%) | 3 (75%) | - | 4 (66.7%) | - | 0  (0%) | 29/39 (74.4%) |
| VA | - | 1 (100%) | 1 (100%) | - | - | 3 (50%) | 0 (0%) | - | 5/9 (55.6%) |
|  |  |  |  |  |  |  |  |  |  |

**Abbreviations
Acineto**: Acinetobacter **AK**: amikacin, **AMC**: amoxicillin and clavulanic acid, **AZM**: azithromycin, **CAZ**: ceftazidime, **CDR**: cefdinir, **Cefo-sulb**: cefoperazone-sulbactam, **CF**: cefaclor, **CFM**: cefixime, **CIP**: ciprofloxacin, **CLR**: clarithromycin, **CPD**: cefpodoxime, **CPM**: cefepime, **CRX**: cefuroxime, **CT**: colistin, **CTR**: ceftriaxone, **CTX**: cefotaxime, **Dori**: doripenem, **Ecoli**: Escherichia coli, **Entero**: Enterobacter, **GN**: gentamycin, **IMP**: imipenem, **K.Pneumo**: : Klebsiella pneumoniae, **LEV**: levofloxacin, **LNZ**: linezolid, **Mero**: meropenem, **NA**: nalidixic acid, **NIT**: nitrofurantoin, **P.aeruginosa**: Pseudomonas aeruginosa, **PF**: pefloxacin, **P.mir**: Proteus mirabilis, **PTZ**: piperacillin/tazobactam, **Serratia**: Serratia marcescens, **S.aur**: Staphylococcus aureus, **S.epi**: Staphylococcus epidermis, **S.pyo**: Staphylococcus pyogenes, **S.sap**: Staphylococcus saprophyticus, **S. pneumo**: Streptococcus pneumoniae, **Ts**: trimethoprim/sulfamethoxazole, **VA**: vancomycin.
